# Supplementary material for: Mujeres sin hogar en España: un análisis sociográfico desde una perspectiva feminista
Source: Royal Society of Chemistry journal article supplement (doi:10.1039/c9cp03717a), 2014-09-01
Supplement: c9cp03717a1.pdf [file c9cp03717a1.pdf]

## Supplementary materials: The influence of $\text{Ho}^{3+}$ doping on $^{13}\text{C}$ DNP in the presence of BDPA

Ram Khattri,<sup>\*†a</sup> Ali A. Sirusi,<sup>\*†b</sup> Eul Hyun Suh,<sup>c</sup> Zoltan Kovacs,<sup>c</sup> and Matthew E. Merritt<sup>a</sup>

### Supplementary Figures:

Supplementary Figure S1:

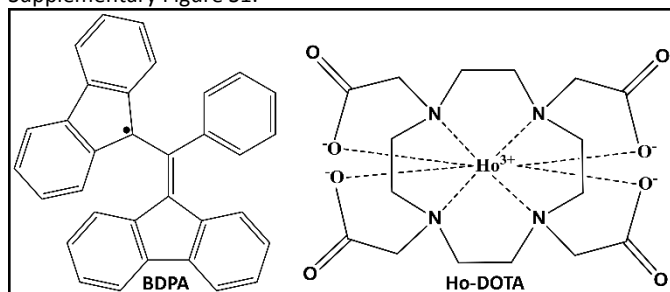

Figure S1. Structures of the BDPA and Ho-DOTA complex discussed in this work

Supplementary Figure S2:

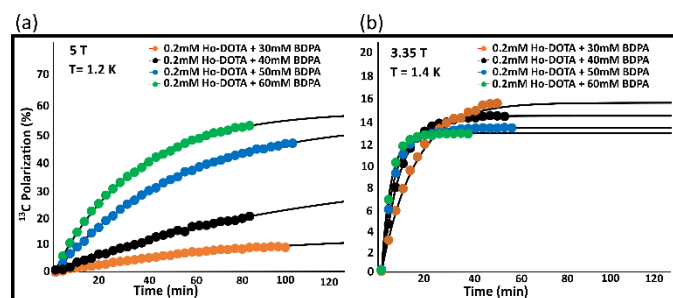

Figure S2.  $^{13}\text{C}$  DNP polarization as a function of irradiation time for 25  $\mu\text{l}$  of 1:1 (v/v) sulfolane/ $[1-^{13}\text{C}]$ pyruvic acid in the presence of various concentrations of BDPA radical with 0.2 mM Ho-DOTA for a) at 5 T and b) 3.35 T. The samples were polarized at the positive polarization peak with a 100 mW microwave source. At 5 T, the sample consisting 60 mM BDPA doped with 0.2 mM of Ho-DOTA shows higher solid-state polarization, whereas at 3.35 T the 30 mM BDPA doped with 0.2 mM of Ho-DOTA produced the highest polarization.
